# Supplementary material for: Low dose environmental radon exposure and breast tumor gene expression
Source: PubMed Central journal article supplement (PMC7385902; doi:10.1186/s12885-020-07184-7), 2020-07-28

**Supplementary Table 1.** Comparison of signs of directionality, magnitude of effect estimates and p-values when modeling radon as cumulative average (i) up to the year of breast cancer diagnosis as a dichotomized variable ( $\geq 2\text{pCi/L}$  vs.  $< 2\text{pCi/L}$ ); (ii) up to the year of breast cancer diagnosis as a continuous variable; and (iii) 5 year prior to breast cancer diagnosis as a dichotomized variable ( $\geq 2\text{pCi/L}$  vs.  $< 2\text{pCi/L}$ ). Top 10 genes (sorted by p-value) associated with cumulative radon exposures ( $\geq 2\text{pCi/L}$  vs.  $< 2\text{pCi/L}$ )—estimated as cumulative averages up to the year of breast cancer diagnosis—by tumor/normal-adjacent and ER status.

| <b>Tumor ER positive (N=707)</b> |                                                           | <i>Cum. average of radon up to the year prior to diagnosis dichotomized at 2pCi/L</i> |                | <i>Cum. average of radon up to the year prior to diagnosis (continuous)</i> |                | <i>Cum. average of radon 5 year prior to diagnosis dichotomized at 2pCi/L</i> |                |
|----------------------------------|-----------------------------------------------------------|---------------------------------------------------------------------------------------|----------------|-----------------------------------------------------------------------------|----------------|-------------------------------------------------------------------------------|----------------|
| <b>Gene Name</b>                 | <b>Description</b>                                        | <b>logFC</b>                                                                          | <b>p-value</b> | <b>logFC</b>                                                                | <b>p-value</b> | <b>logFC</b>                                                                  | <b>p-value</b> |
| <i>CLIC1</i>                     | chloride intracellular channel 1                          | -0.09                                                                                 | 2.00E-05       | -0.031                                                                      | 3.26E-04       | -0.059                                                                        | 4.41E-04       |
| <i>CCDC43</i>                    | coiled-coil domain containing 43                          | 0.11                                                                                  | 5.67E-05       | 0.036                                                                       | 1.79E-03       | 0.079                                                                         | 1.31E-03       |
| <i>NPIPA1</i>                    | nuclear pore complex interacting protein family member A1 | -0.13                                                                                 | 9.87E-05       | -0.050                                                                      | 4.38E-04       | -0.059                                                                        | 1.52E-02       |
| <i>MRPS18A</i>                   | mitochondrial ribosomal protein S18A                      | 0.10                                                                                  | 1.18E-04       | 0.043                                                                       | 1.40E-04       | 0.078                                                                         | 1.89E-03       |
| <i>SLC30A9</i>                   | solute carrier family 30 member 9                         | 0.08                                                                                  | 1.36E-04       | 0.036                                                                       | 1.66E-04       | 0.064                                                                         | 9.66E-04       |
| <i>FXR1</i>                      | FMR1 autosomal homolog 1                                  | 0.12                                                                                  | 1.48E-04       | 0.040                                                                       | 3.14E-03       | 0.101                                                                         | 4.77E-04       |
| <i>SPATA18</i>                   | spermatogenesis associated 18                             | 0.10                                                                                  | 1.62E-04       | 0.033                                                                       | 2.56E-03       | 0.086                                                                         | 2.12E-04       |
| <i>LSM1</i>                      | LSM1 homolog, mRNA degradation associated                 | 0.09                                                                                  | 1.82E-04       | 0.034                                                                       | 1.14E-03       | -0.043                                                                        | 1.32E-02       |
| <i>COL18A1</i>                   | collagen type XVIII alpha 1 chain                         | -0.09                                                                                 | 2.29E-04       | -0.039                                                                      | 2.98E-04       | -0.053                                                                        | 3.91E-03       |
| <i>SHISA4</i>                    | shisa family member 4                                     | -0.08                                                                                 | 2.37E-04       | -0.033                                                                      | 2.02E-04       | 0.062                                                                         | 1.77E-03       |

  

| <b>Tumor ER negative (N=167)</b> |                                                      | <i>Cum. average of radon up to the year prior to diagnosis dichotomized at 2pCi/L</i> |                | <i>Cum. average of radon up to the year prior to diagnosis (continuous)</i> |                | <i>Cum. average of radon 5 year prior to diagnosis dichotomized at 2pCi/L</i> |                |
|----------------------------------|------------------------------------------------------|---------------------------------------------------------------------------------------|----------------|-----------------------------------------------------------------------------|----------------|-------------------------------------------------------------------------------|----------------|
| <b>Gene Name</b>                 | <b>Description</b>                                   | <b>logFC</b>                                                                          | <b>p-value</b> | <b>logFC</b>                                                                | <b>p-value</b> | <b>logFC</b>                                                                  | <b>p-value</b> |
| <i>RAB21</i>                     | RAB21, member RAS oncogene family                    | 0.32                                                                                  | 1.82E-05       | 0.097                                                                       | 4.24E-03       | 0.287                                                                         | 3.38E-04       |
| <i>C1orf174</i>                  | chromosome 1 open reading frame 174                  | -0.15                                                                                 | 4.56E-04       | -0.045                                                                      | 1.69E-02       | -0.177                                                                        | 4.99E-05       |
| <i>GPR135</i>                    | G protein-coupled receptor 135                       | 0.19                                                                                  | 5.68E-04       | 0.044                                                                       | 6.87E-02       | 0.187                                                                         | 8.59E-04       |
| <i>ABHD17B</i>                   | abhydrolase domain containing 17B                    | -0.14                                                                                 | 9.34E-04       | -0.043                                                                      | 2.15E-02       | -0.123                                                                        | 3.66E-03       |
| <i>SELENOM</i>                   | selenoprotein M                                      | -0.15                                                                                 | 1.36E-03       | -0.057                                                                      | 5.19E-03       | -0.112                                                                        | 1.87E-02       |
| <i>ZNF789</i>                    | zinc finger protein 789                              | 0.20                                                                                  | 2.12E-03       | 0.050                                                                       | 8.35E-02       | 0.154                                                                         | 1.77E-02       |
| <i>CAMK2D</i>                    | calcium/calmodulin dependent protein kinase II delta | 0.27                                                                                  | 2.16E-03       | 0.101                                                                       | 1.10E-02       | 0.225                                                                         | 1.66E-02       |
| <i>DMWD</i>                      | dystrophia myotonica, WD repeat containing           | 0.17                                                                                  | 2.18E-03       | 0.061                                                                       | 1.50E-02       | 0.196                                                                         | 8.64E-04       |
| <i>CDX2</i>                      | caudal type homeobox 2                               | -0.15                                                                                 | 2.25E-03       | -0.030                                                                      | 1.78E-01       | -0.136                                                                        | 7.15E-03       |
| <i>FN3KRP</i>                    | fructosamine 3 kinase related protein                | 0.22                                                                                  | 2.31E-03       | 0.064                                                                       | 4.59E-02       | 0.195                                                                         | 9.98E-03       |

  

| <b>Normal-adjacent ER positive (N=558)</b> |                             | <i>Cum. average of radon up to the year prior to diagnosis dichotomized at 2pCi/L</i> |                | <i>Cum. average of radon up to the year prior to diagnosis (continuous)</i> |                | <i>Cum. average of radon 5 year prior to diagnosis dichotomized at 2pCi/L</i> |                |
|--------------------------------------------|-----------------------------|---------------------------------------------------------------------------------------|----------------|-----------------------------------------------------------------------------|----------------|-------------------------------------------------------------------------------|----------------|
| <b>Gene Name</b>                           | <b>Description</b>          | <b>logFC</b>                                                                          | <b>p-value</b> | <b>logFC</b>                                                                | <b>p-value</b> | <b>logFC</b>                                                                  | <b>p-value</b> |
| <i>PLCH2</i>                               | phospholipase C eta 2       | -0.082                                                                                | 2.71E-06       | -0.026                                                                      | 3.13E-04       | -0.083                                                                        | 3.45E-06       |
| <i>VTA1</i>                                | vesicle trafficking 1       | 0.109                                                                                 | 3.74E-05       | 0.040                                                                       | 2.86E-04       | 0.117                                                                         | 1.89E-05       |
| <i>DEAF1</i>                               | DEAF1, transcription factor | -0.090                                                                                | 3.85E-05       | -0.026                                                                      | 4.90E-03       | -0.100                                                                        | 7.16E-06       |

|                 |                                                          |        |          |        |          |        |          |
|-----------------|----------------------------------------------------------|--------|----------|--------|----------|--------|----------|
| <i>TMEM80</i>   | transmembrane protein 80                                 | -0.103 | 4.20E-05 | -0.035 | 7.04E-04 | -0.094 | 2.70E-04 |
| <i>MAPK8IP3</i> | mitogen-activated protein kinase 8 interacting protein 3 | -0.073 | 5.09E-05 | -0.016 | 3.78E-02 | -0.083 | 7.01E-06 |
| <i>TUBGCP3</i>  | tubulin gamma complex associated protein 3               | 0.074  | 5.33E-05 | 0.014  | 6.51E-02 | 0.071  | 1.65E-04 |
| <i>ACAP3</i>    | ArfGAP with coiled-coil, ankyrin repeat and PH domains 3 | -0.074 | 6.25E-05 | -0.015 | 5.62E-02 | -0.078 | 3.81E-05 |
| <i>TSPAN18</i>  | tetraspanin 18                                           | -0.097 | 7.50E-05 | -0.028 | 5.40E-03 | -0.091 | 2.79E-04 |
| <i>SNRPF</i>    | small nuclear ribonucleoprotein polypeptide F            | 0.140  | 8.18E-05 | 0.041  | 5.48E-03 | 0.137  | 1.71E-04 |
| <i>MBD3</i>     | methyl-CpG binding domain protein 3                      | -0.112 | 8.95E-05 | -0.026 | 3.04E-02 | -0.122 | 2.65E-05 |

### Normal-adjacent ER negative (N=129)

| Gene Name        | Description                                                              | Cum. average of radon up to the year prior to diagnosis dichotomized at 2pCi/L |          | Cum. average of radon up to the year prior to diagnosis (continuous) |          | Cum. average of radon 5 year prior to diagnosis dichotomized at 2pCi/L |          |
|------------------|--------------------------------------------------------------------------|--------------------------------------------------------------------------------|----------|----------------------------------------------------------------------|----------|------------------------------------------------------------------------|----------|
|                  |                                                                          | logFC                                                                          | p-value  | logFC                                                                | p-value  | logFC                                                                  | p-value  |
| <i>LDOC1</i>     | LDOC1, regulator of NFkB signaling                                       | 0.30                                                                           | 2.11E-04 | 0.057                                                                | 3.35E-03 | 0.270                                                                  | 7.29E-04 |
| <i>C2CD4B</i>    | C2 calcium dependent domain containing 4B                                | -0.29                                                                          | 4.23E-04 | -0.069                                                               | 4.83E-02 | -0.302                                                                 | 8.81E-05 |
| <i>MYF6</i>      | myogenic factor 6                                                        | -0.25                                                                          | 5.45E-04 | 0.038                                                                | 3.39E-02 | -0.187                                                                 | 3.53E-03 |
| <i>WT1-AS</i>    | WT1 antisense RNA                                                        | -0.16                                                                          | 5.51E-04 | 0.084                                                                | 3.82E-03 | -0.129                                                                 | 7.91E-04 |
| <i>GATS</i>      | GATS, stromal antigen 3 opposite strand                                  | 0.14                                                                           | 5.77E-04 | 0.060                                                                | 8.73E-02 | 0.153                                                                  | 1.47E-04 |
| <i>ARSG</i>      | arylsulfatase G                                                          | 0.15                                                                           | 1.03E-03 | 0.080                                                                | 2.29E-03 | 0.135                                                                  | 2.79E-03 |
| <i>TBL1X</i>     | transducin beta like 1X-linked                                           | 0.13                                                                           | 1.09E-03 | -0.063                                                               | 4.60E-02 | 0.099                                                                  | 7.09E-03 |
| <i>MIF</i>       | macrophage migration inhibitory factor (glycosylation-inhibiting factor) | 0.20                                                                           | 1.22E-03 | 0.030                                                                | 2.09E-01 | 0.170                                                                  | 1.62E-03 |
| <i>KRTAP10-2</i> | keratin associated protein 10-2                                          | 0.22                                                                           | 1.32E-03 | 0.021                                                                | 2.20E-01 | 0.214                                                                  | 7.76E-04 |
| <i>PREX1</i>     | phosphatidylinositol-3,4,5-trisphosphate dependent Rac exchange factor 1 | 0.17                                                                           | 1.35E-03 | -0.028                                                               | 1.62E-01 | 0.141                                                                  | 8.77E-03 |

In each regression model, we adjusted for the following covariates selected *a priori*: age at diagnosis (continuous), year of diagnosis (continuous), hormone therapy use (postmenopausal not using / postmenopausal using / premenopausal or unknown), BMI (continuous), Census tract area-level socioeconomic status (continuous), study region (Northeast / Midwest / West / South) and surrogate variables generated from the transcriptome data.

**Supplementary Table 2.** Top 10 genes (sorted by p-value) associated with cumulative radon exposures—estimated as cumulative averages up to the year of breast cancer diagnosis—by tumor/normal-adjacent and ER status.

| Tumor ER positive |                                                           | Smoking > 16 pack-years<br>N=251 |              |          | Never smoker<br>N=378 |              |          |
|-------------------|-----------------------------------------------------------|----------------------------------|--------------|----------|-----------------------|--------------|----------|
| Gene Name         | Description                                               | logFC                            | t statistics | p-value  | logFC                 | t statistics | p-value  |
| CLIC1             | chloride intracellular channel 1                          | -0.07                            | -2.17        | 3.06E-02 | -0.08                 | -2.70        | 7.33E-03 |
| CCDC43            | coiled-coil domain containing 43                          | 0.13                             | 2.53         | 1.19E-02 | 0.10                  | 2.69         | 7.41E-03 |
| NPIPA1            | nuclear pore complex interacting protein family member A1 | -0.12                            | -1.61        | 1.08E-01 | -0.14                 | -2.99        | 3.00E-03 |
| MRPS18A           | mitochondrial ribosomal protein S18A                      | 0.10                             | 1.62         | 1.06E-01 | 0.08                  | 2.50         | 1.29E-02 |
| SLC30A9           | solute carrier family 30 member 9                         | 0.07                             | 1.18         | 2.39E-01 | 0.09                  | 3.22         | 1.41E-03 |
| FXR1              | FMR1 autosomal homolog 1                                  | 0.08                             | 0.82         | 4.13E-01 | 0.12                  | 2.76         | 6.12E-03 |
| SPATA18           | spermatogenesis associated 18                             | 0.05                             | 1.28         | 2.03E-01 | 0.12                  | 3.39         | 7.79E-04 |
| LSM1              | LSM1 homolog, mRNA degradation associated                 | 0.06                             | 1.23         | 2.18E-01 | 0.12                  | 3.68         | 2.63E-04 |
| COL18A1           | collagen type XVIII alpha 1 chain                         | -0.03                            | -0.67        | 5.01E-01 | -0.09                 | -2.95        | 3.40E-03 |
| SHISA4            | shisa family member 4                                     | -0.08                            | -2.27        | 2.42E-02 | -0.08                 | -2.73        | 6.56E-03 |

  

| Tumor ER negative |                                                      | Smoking > 16 pack-years<br>N=60 |              |          | Never smoker<br>N=90 |              |          |
|-------------------|------------------------------------------------------|---------------------------------|--------------|----------|----------------------|--------------|----------|
| Gene Name         | Description                                          | logFC                           | t statistics | p-value  | logFC                | t statistics | p-value  |
| <i>RAB21</i>      | RAB21, member RAS oncogene family                    | 0.18                            | 1.15         | 2.56E-01 | 0.28                 | 3.83         | 2.47E-04 |
| <i>C1orf174</i>   | chromosome 1 open reading frame 174                  | -0.33                           | -3.60        | 6.73E-04 | -0.06                | -1.18        | 2.40E-01 |
| <i>GPR135</i>     | G protein-coupled receptor 135                       | 0.10                            | 0.93         | 3.57E-01 | 0.20                 | 2.92         | 4.55E-03 |
| <i>ABHD17B</i>    | abhydrolase domain containing 17B                    | -0.18                           | -1.93        | 5.93E-02 | -0.07                | -1.42        | 1.58E-01 |
| <i>SELENOM</i>    | selenoprotein M                                      | -0.32                           | -3.05        | 3.52E-03 | -0.07                | -1.39        | 1.67E-01 |
| <i>ZNF789</i>     | zinc finger protein 789                              | 0.29                            | 2.14         | 3.68E-02 | 0.19                 | 2.70         | 8.38E-03 |
| <i>CAMK2D</i>     | calcium/calmodulin dependent protein kinase II delta | 0.10                            | 0.55         | 5.87E-01 | 0.31                 | 3.12         | 2.46E-03 |
| <i>DMWD</i>       | dystrophia myotonica, WD repeat containing           | 0.16                            | 1.39         | 1.71E-01 | 0.17                 | 2.38         | 1.96E-02 |
| <i>CDX2</i>       | caudal type homeobox 2                               | -0.20                           | -1.65        | 1.05E-01 | -0.08                | -1.53        | 1.29E-01 |
| <i>FN3KRP</i>     | fructosamine 3 kinase related protein                | 0.19                            | 1.32         | 1.91E-01 | 0.17                 | 1.96         | 5.28E-02 |

In each regression model, we adjusted for the following covariates selected *a priori*: age at diagnosis (continuous), year of diagnosis (continuous), hormone therapy use (postmenopausal not using / postmenopausal using / premenopausal or unknown), BMI (continuous), Census tract area-level socioeconomic status (continuous), study region (Northeast / Midwest / West / South) and surrogate variables generated from the transcriptome data.

**Supplementary Table 3.** Summary of main findings. Sample size: ER positive tumor (N=707), ER negative tumor (N=167), ER positive normal-adjacent tissue (N=558) and ER negative normal-adjacent tissue (N=129).

|                        |                             | <b>ER positive</b> | <b>ER negative</b> |
|------------------------|-----------------------------|--------------------|--------------------|
| <b>Tumor</b>           | <i>Single gene analysis</i> | None at FDR<5%     | None at FDR<5%     |
|                        | <i>Pathway analysis</i>     | None at FDR<25%    | 1 at FDR<25%       |
| <b>Normal-adjacent</b> | <i>Single gene analysis</i> | 1 at FDR<5%        | None at FDR<5%     |
|                        | <i>Pathway analysis</i>     | None at FDR<25%    | 1 at FDR<25%       |

**Supplementary Figure 1.** Map of annual average radon concentration generated from ArcGIS 10.3.1. This figure is not under copyright.

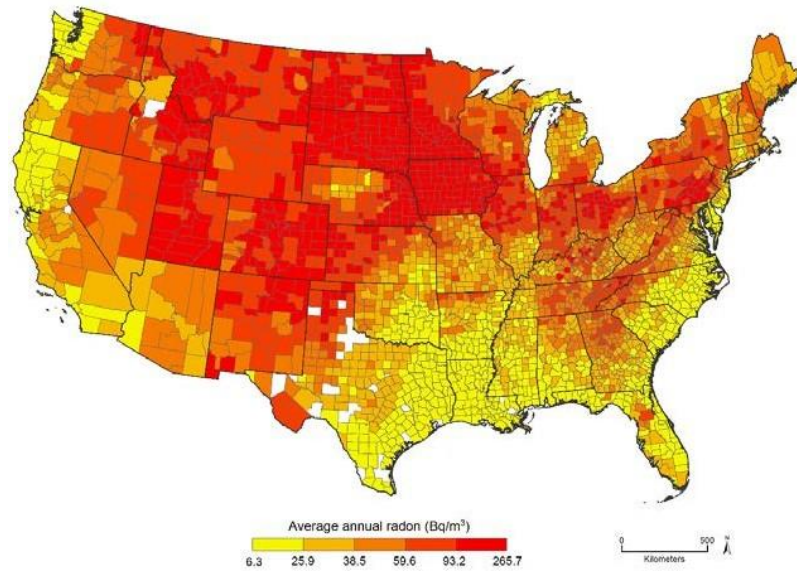

**Supplementary Figure 2.** Distribution of cumulative radon concentrations for study participants. Sample size: ER positive tumor (N=707), ER negative tumor (N=167), ER positive normal-adjacent tissue (N=558) and ER negative normal-adjacent tissue (N=129).

**Distribution of cumulative average radon concentration (ER+ tumor)**

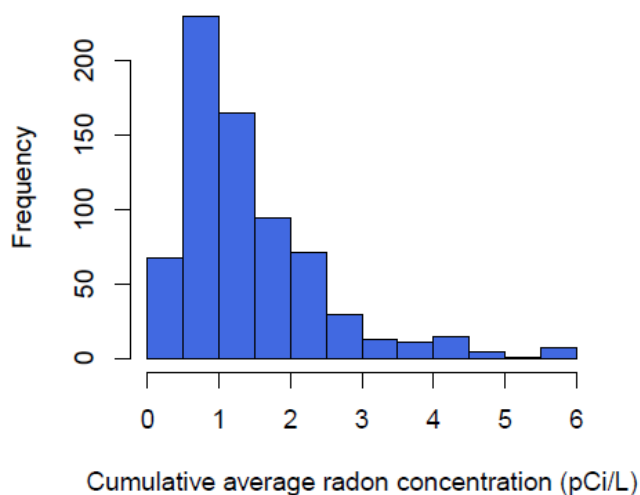

**Distribution of cumulative average radon concentration (ER- tumor)**

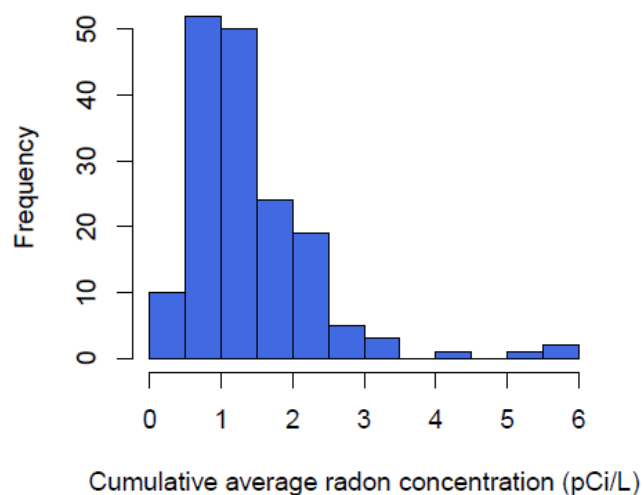

**Distribution of cumulative average radon concentration (ER+ normal-adj.)**

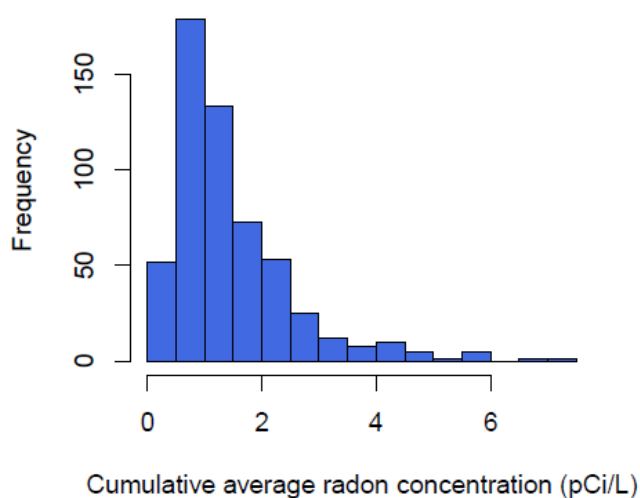

**Distribution of cumulative average radon concentration (ER- normal-adj.)**

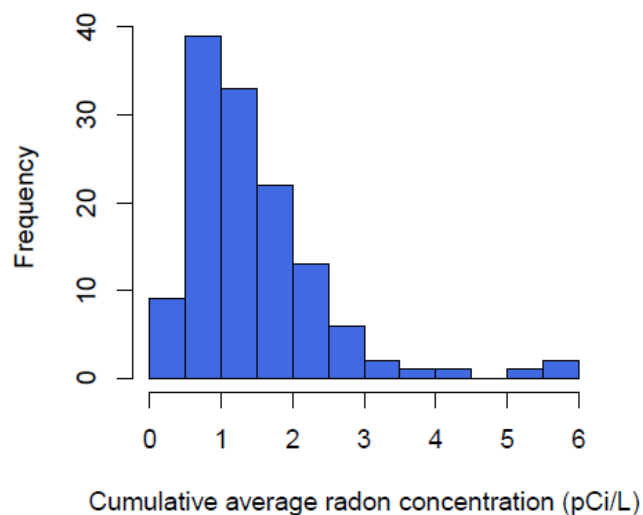

**Supplementary Figure 3.** Gene-set enrichment analysis results (FDR<25%). In ER negative tumor samples, we identified p38MAPK pathway significantly enriched at FDR<25%. In ER negative normal-adjacent samples, we identified biosynthesis of phosphocholine pathway significantly enriched at FDR<25%.

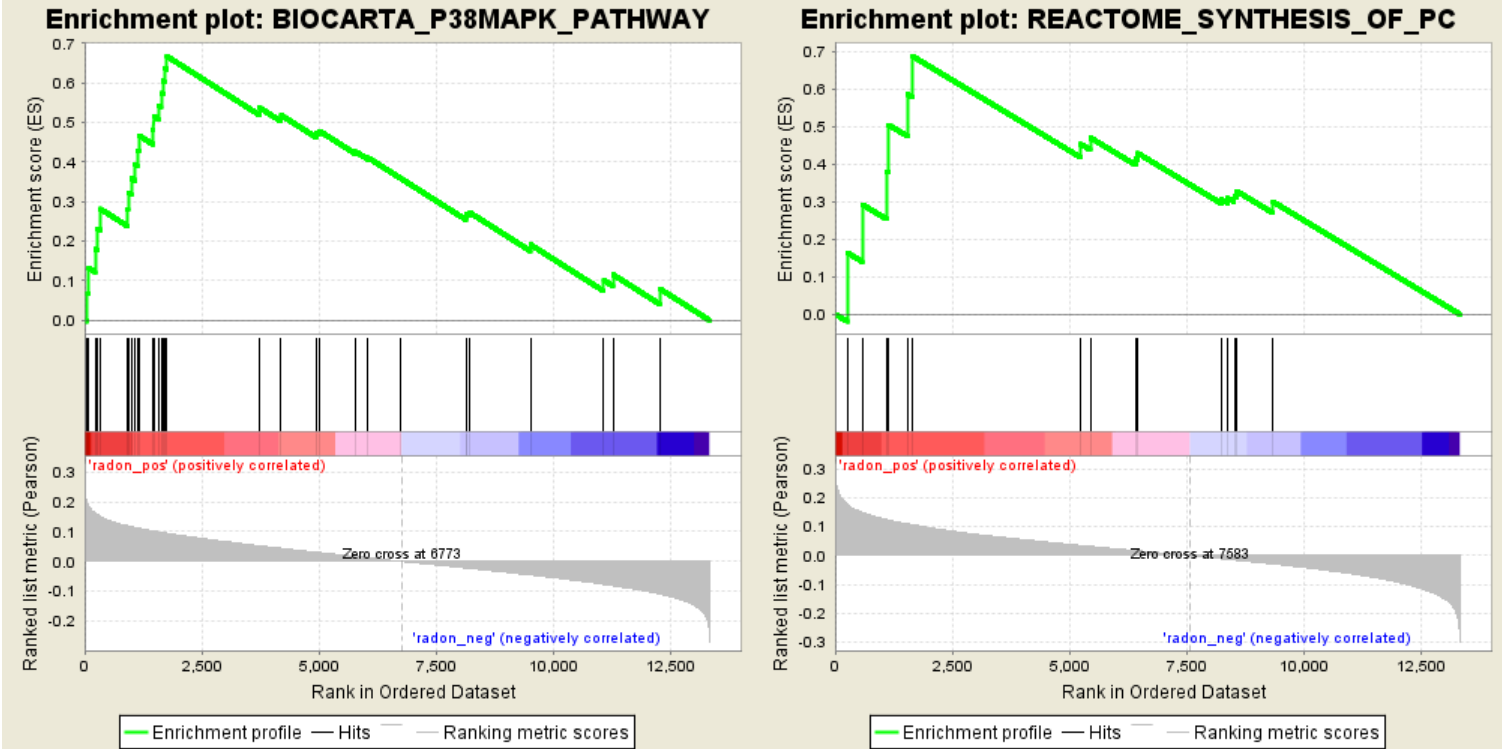

Supplement: 12885_2020_7184_MOESM1_ESM.pdf [file 12885_2020_7184_MOESM1_ESM.pdf]
